# Supplementary material for: Lack of significant recovery of chloroquine sensitivity in Plasmodium falciparum parasites following discontinuance of chloroquine use in Papua New Guinea
Source: Springer Nature journal article supplement (doi:10.1186/s12936-018-2585-x), 2018-11-26
Supplement: MOESM1 [file 16295712]

Additional file 1. Characteristics of enrolled patients at each sampling site

|                       | 2016 (N=123)            |                         | 2017 (N=134)            |                        | 2018 (N=111)            |                         |
|-----------------------|-------------------------|-------------------------|-------------------------|------------------------|-------------------------|-------------------------|
|                       | Wirui Urban             | Town                    | Wirui Urban             | Town                   | Wirui Urban             | Town                    |
| Number of patients; n | 89                      | 34                      | 40                      | 94                     | 57                      | 54                      |
| Age; n                |                         |                         |                         |                        |                         |                         |
| 0-4                   | 1                       | 1                       | 2                       | 3                      | 1                       | 2                       |
| 5-9                   | 8                       | 5                       | 6                       | 13                     | 8                       | 11                      |
| 10-19                 | 34                      | 9                       | 19                      | 36                     | 23                      | 21                      |
| 20-29                 | 19                      | 9                       | 9                       | 23                     | 15                      | 9                       |
| 30-39                 | 11                      | 4                       | 2                       | 7                      | 4                       | 4                       |
| 40-49                 | 10                      | 1                       | 0                       | 6                      | 3                       | 4                       |
| 50-                   | 4                       | 5                       | 2                       | 5                      | 3                       | 2                       |
| Unknown               | 2                       | 0                       | 0                       | 1                      | 0                       | 1                       |
| Average               | 23.9                    | 23.9                    | 17.4                    | 20.8                   | 21.1                    | 19.8                    |
| Sex; n (%)            |                         |                         |                         |                        |                         |                         |
| Male                  | 41                      | 12                      | 23                      | 34                     | 33                      | 24                      |
| Female                | 48                      | 21                      | 17                      | 59                     | 23                      | 30                      |
| Unknown               | 0                       | 0                       | 0                       | 1                      | 1                       | 0                       |
| Pretreatment; n (%)   |                         |                         |                         |                        |                         |                         |
| Yes                   | 3                       | 3                       | 0                       | 12                     | 3                       | 6                       |
| No                    | 85                      | 31                      | 40                      | 82                     | 54                      | 48                      |
| Parasitemia; (%)      |                         |                         |                         |                        |                         |                         |
| Median (IQR*)         | 0.14%<br>(0.14%, 0.43%) | 0.12%<br>(0.02%, 1.05%) | 0.39%<br>(0.11%, 0.79%) | 0.32%<br>(0.1%, 0.90%) | 0.12%<br>(0.02%, 0.58%) | 0.09%<br>(0.02%, 0.41%) |

\* Interquartile range
