# Supplementary material for: Lack of significant recovery of chloroquine sensitivity in Plasmodium falciparum parasites following discontinuance of chloroquine use in Papua New Guinea
Source: Springer Nature journal article supplement (doi:10.1186/s12936-018-2585-x), 2018-11-26
Supplement: MOESM2 [file 16295712]

Additional file 2. Allele prevalence in *pfcr1* and *pfmdr1*

|                              | 2016 |            | 2017 |            | 2018 |            |
|------------------------------|------|------------|------|------------|------|------------|
|                              | No   | Prevalence | No   | Prevalence | No   | Prevalence |
| <b><i>Pfcr1</i>*</b>         |      |            |      |            |      |            |
| CVMNK                        | 2    | 0.02       | 12   | 0.10       | 12   | 0.12       |
| <u>S</u> VMN <u>I</u>        | 106  | 0.98       | 101  | 0.87       | 90   | 0.88       |
| CVMNK+ <u>S</u> VMN <u>I</u> | 0    | 0.00       | 3    | 0.03       | 0    | 0.00       |
| <b><i>Pfmdr1</i></b>         |      |            |      |            |      |            |
| N86                          | 66   | 0.59       | 85   | 0.70       | 69   | 0.72       |
| N86Y                         | 44   | 0.40       | 33   | 0.27       | 27   | 0.28       |
| N86+N86Y                     | 1    | 0.01       | 3    | 0.02       | 0    | 0.00       |
| Y184                         | 89   | 0.80       | 103  | 0.85       | 86   | 0.86       |
| Y184F                        | 21   | 0.19       | 15   | 0.12       | 14   | 0.14       |
| Y184+Y184F                   | 1    | 0.01       | 3    | 0.02       | 0    | 0.00       |
| S1034                        | 80   | 1.00       | 88   | 1.00       | 100  | 1.00       |
| S1034C                       | 0    | 0.00       | 0    | 0.00       | 0    | 0.00       |
| S1034+S1034C                 | 0    | 0.00       | 0    | 0.00       | 0    | 0.00       |
| N1042                        | 67   | 0.91       | 78   | 0.87       | 89   | 0.89       |
| N1042D                       | 7    | 0.09       | 10   | 0.11       | 11   | 0.11       |
| N1042+N1042D                 | 0    | 0.00       | 2    | 0.02       | 0    | 0.00       |
| D1246                        | 95   | 1.00       | 115  | 1.00       | 100  | 1.00       |
| D1246Y                       | 0    | 0.00       | 0    | 0.00       | 0    | 0.00       |
| D1246+D1246Y                 | 0    | 0.00       | 0    | 0.00       | 0    | 0.00       |

\* Amino acids at positions 72–76, mutation underlined
