# Supplementary material for: Lack of significant recovery of chloroquine sensitivity in Plasmodium falciparum parasites following discontinuance of chloroquine use in Papua New Guinea
Source: Springer Nature journal article supplement (doi:10.1186/s12936-018-2585-x), 2018-11-26

Additional file 3. Association between IC<sub>50</sub> values for chloroquine and polymorphisms at position 184 in *pfmdr1* in the parasites with the *pfcr1* K76T mutation

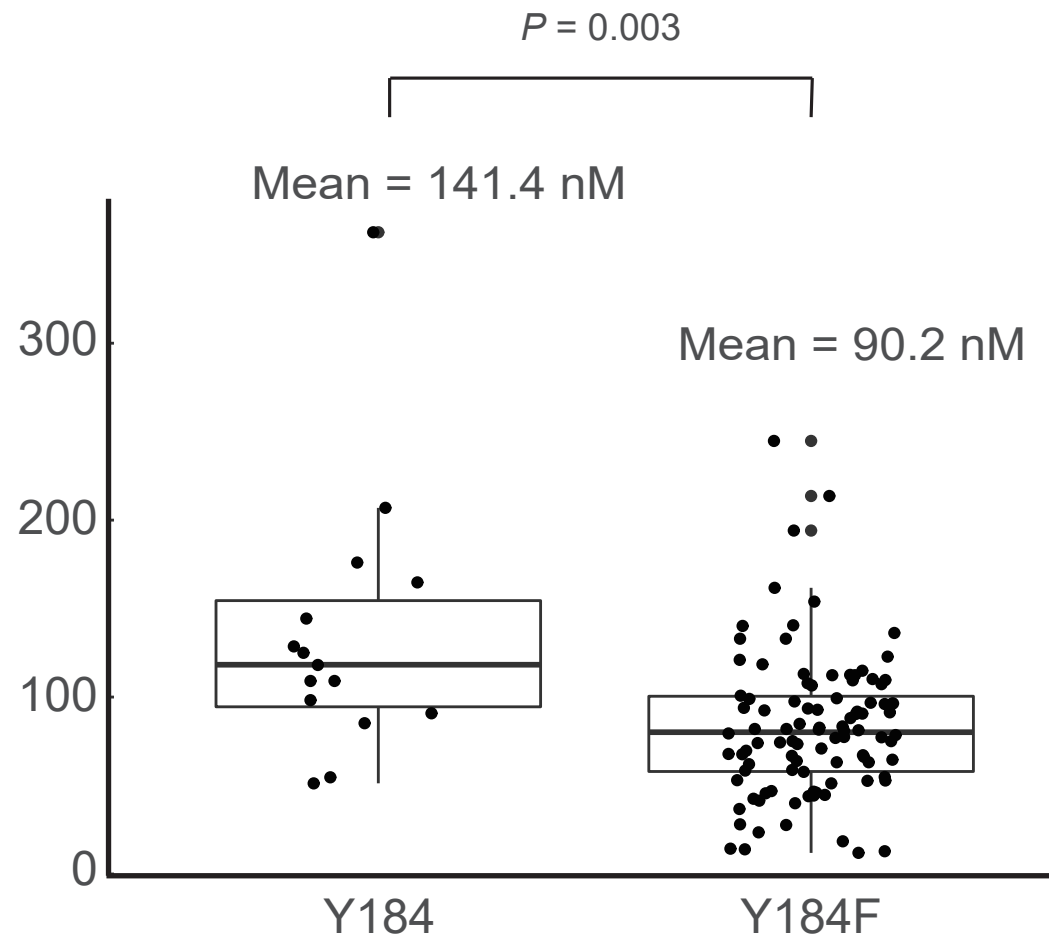

Supplement: MOESM3 [file 16295712]
